# Supplementary material for: Ln-MOFs with window-shaped channels based on triazine tricarboxylic acid as a linker for the highly efficient capture of cationic dyes and iodine
Source: Royal Society of Chemistry journal article supplement (doi:10.1039/d0qi01279c), 2021-01-01
Supplement: d0qi01279c1.pdf [file d0qi01279c1.pdf]

# **Ln-MOFs with window-shaped channels based on triazine tricarboxylic acid as a linker: high-efficient capture of cationic dyes and iodine**

Yue Zhao<sup>a</sup>, Na Zhang<sup>a</sup>, Ying Wang<sup>a</sup>, Feng Ying Bai<sup>\*a</sup>, Yong Heng Xing<sup>\*a</sup>, Li Xian Sun<sup>b</sup>

<sup>a</sup>College of Chemistry and Chemical Engineering, Liaoning Normal University, Huang he Road 850#, Dalian 116029, P.R. China.

<sup>b</sup>Guangxi Key Laboratory of Information Materials, Guilin University of Electronic Technology, Guilin City, 541004, P.R. China

# Supporting Information Contents

|                                                                                       |    |
|---------------------------------------------------------------------------------------|----|
| Materials and methods .....                                                           | 3  |
| Spectra characteristics of pro-ligand H <sub>3</sub> TATAB (Fig. S1-S3). ....         | 3  |
| IR spectra of 1-7 at room temperature (Fig. S4-S10). ....                             | 5  |
| Table S1. Detailed attributes of the IR data for 1-7.....                             | 7  |
| UV-Vis spectra of 1-7(Fig. S11-17). ....                                              | 8  |
| Table S2. Detailed attributes of UV-Vis data for 1-7. <sup>1-3</sup> .....            | 10 |
| TG curves of 1-7(Fig. S18-S24). ....                                                  | 11 |
| Solid fluorescence spectra of 3 and 4.....                                            | 13 |
| The stability test of 1 soaked in H <sub>2</sub> O and cyclohexane for 12h.....       | 14 |
| PXRD patterns for 1 after capturing MB. ....                                          | 14 |
| PXRD patterns for 1 after capturing I <sub>2</sub> and releasing I <sub>2</sub> ..... | 15 |
| IR and UV-vis spectra for 1 after capturing I <sub>2</sub> .....                      | 15 |
| PXRD Pawley refinement of I <sub>2</sub> @1.....                                      | 16 |
| The cycle tests of adsorption-desorption of I <sub>2</sub> with 1.....                | 16 |
| The first-order-equation fitting model of adsorption to I <sub>2</sub> with 1. ....   | 17 |
| Table S3. Crystallographic data of 1-3*.....                                          | 17 |
| Table S4. Crystallographic data of 4-7*.....                                          | 18 |
| Table S5. Selected distances (Å) for 1-7. ....                                        | 19 |
| Table S6. The comparison of I <sub>2</sub> adsorption amount in recent years. ....    | 21 |
| Table S7. Reflex summary report for Pawley refinement of I <sub>2</sub> @1.....       | 22 |
| References .....                                                                      | 22 |

**Materials and methods.** Lanthanide nitrate salts were prepared via dissolving lanthanide oxides with 12 M HNO<sub>3</sub> and then evaporating at 100 °C until the crystal film formed. Other chemicals purchased are not further purified or post-treated. The elemental analysis were carried out on a Perkin-Elmer 240C automatic analyzer. Infrared spectra were measured on a Bruker AXS TENSOR-27 in the range of 400-4000 cm<sup>-1</sup> at room temperature. UV-Vis spectra were recorded on JASCO V-570 spectrometer (200-2500 nm, in form of solid sample). X-ray powder diffraction (XRD) data were collected on a Bruker Advance-D8 with Cu-K $\alpha$  radiation, in the range 5° <2 $\theta$ < 50°, with a step size of 0.02° (2 $\theta$ ) and an acquisition time of 2 s per step. Thermogravimetric analysis (TG) was performed on a Perkin Elmer Diamond TG/DTA under the conditions of the N<sub>2</sub> atmosphere in the temperature range from 30°C to 800°C. The scanning electron microscope (SEM) images were acquired using a SU8010 scanning electron microscope (HITACHI, Tokyo, Japan).

### Spectra characteristics of pro-ligand H<sub>3</sub>TATAB (Fig.S1-S3).

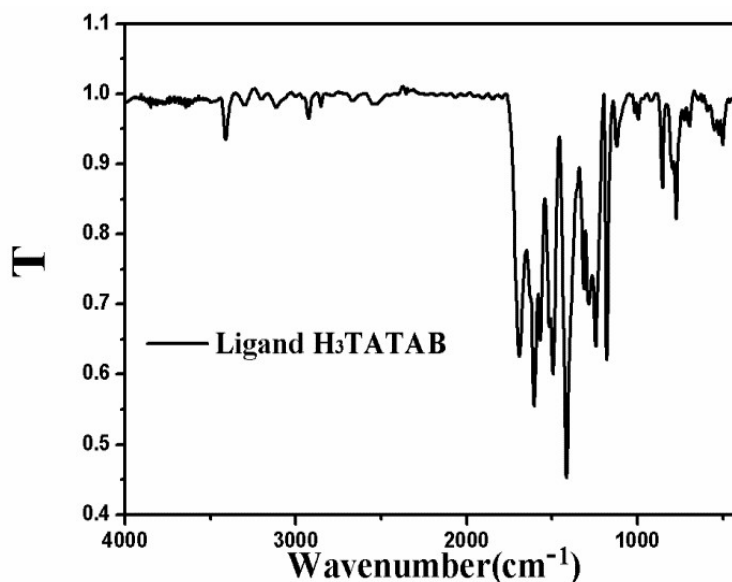

Fig.S1 IR spectrum of pro-ligand H<sub>3</sub>TATAB (298K).

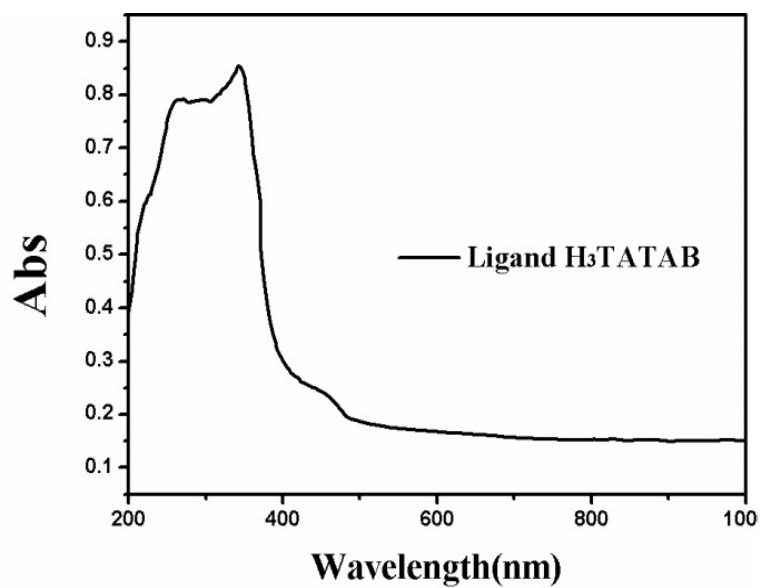

Fig.S2 Solid UV-Vis spectrum of pro-ligand H<sub>3</sub>TATAB (298K).

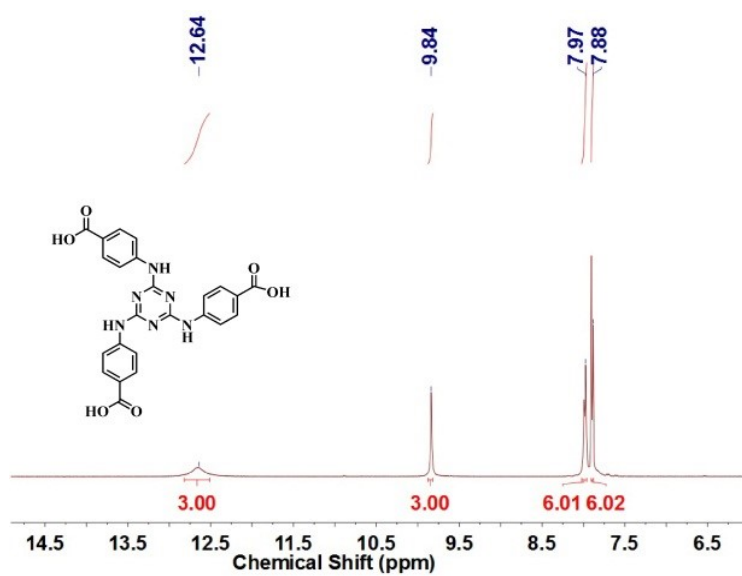

Fig.S3 <sup>1</sup>H NMR (400 MHz, d<sub>6</sub>-DMSO, 298K) spectrum.

IR spectra of 1-7 at room temperature (Fig.S4-S10).

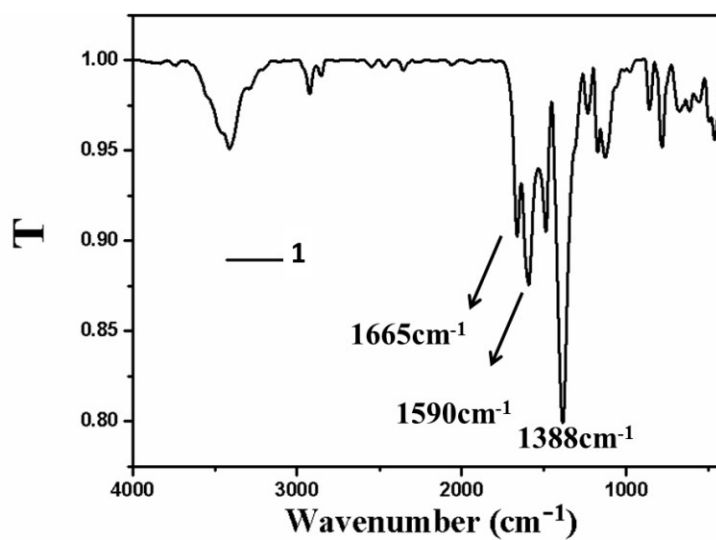

Fig.S4 IR spectrum of 1 at room temperature.

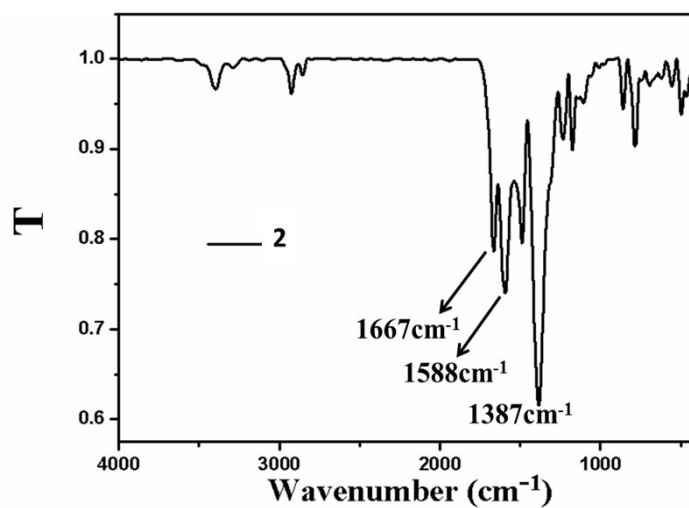

Fig.S5 IR spectrum of 2 at room temperature.

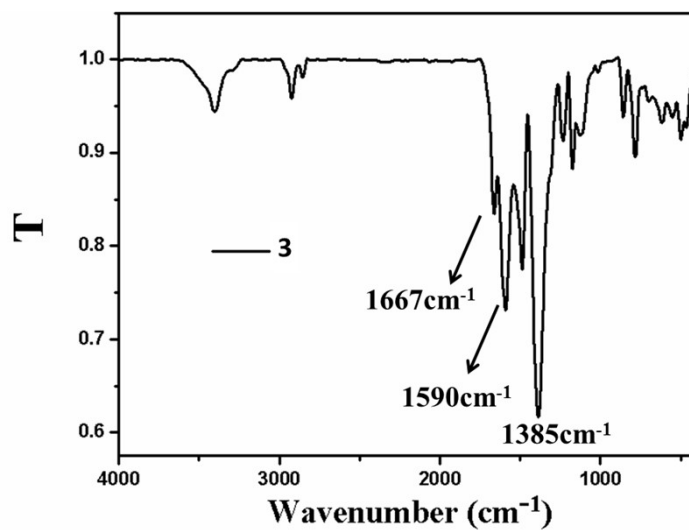

Fig.S6 IR spectrum of **3** at room temperature.

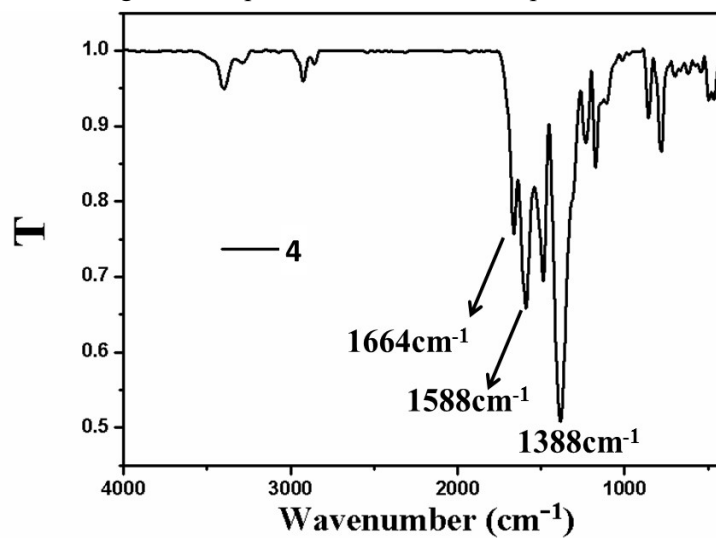

Fig.S7 IR spectrum of **4** at room temperature.

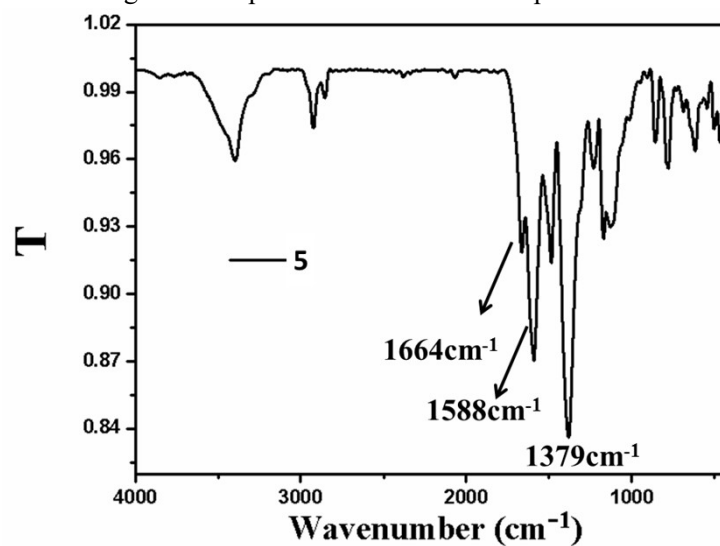

Fig.S8 IR spectrum of **5** at room temperature.

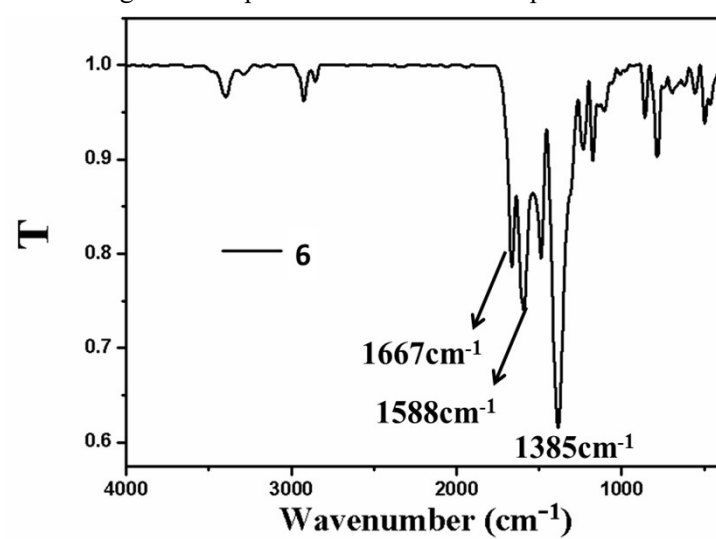

Fig.S9 IR spectrum of **6** at room temperature.

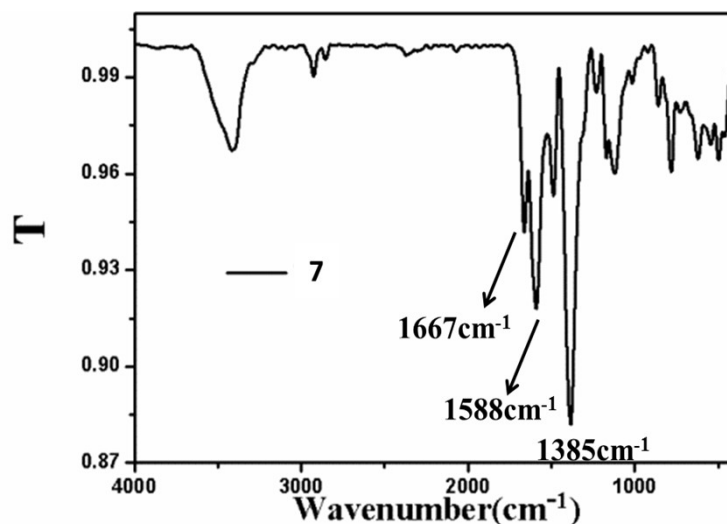

Fig.S10 IR spectrum of 7 at room temperature.

**Table S1. Detailed attributes of the IR data for 1-7.**

|                              | 1         | 2         | 3         | 4         | 5         | 6         | 7         |
|------------------------------|-----------|-----------|-----------|-----------|-----------|-----------|-----------|
| $\nu_{\text{O-H}}$           | 3404      | 3394      | 3411      | 3404      | 3396      | 3394      | 3411      |
| $\nu_{\text{-CH}_2\text{-}}$ | 2928,2860 | 2928,2853 | 2926,2856 | 2928,2860 | 2928,2853 | 2928,2856 | 2926,2863 |
| $\nu_{\text{asCOO}^-}$       | 1665,1590 | 1662,1588 | 1667,1590 | 1664,1588 | 1664,1588 | 1667,1596 | 1667,1588 |
| $\nu_{\text{(C=N,C=C)}}$     | 1489      | 1489      | 1490      | 1489      | 1489      | 1488      | 1490      |
| $\nu_{\text{sCOO}^-}$        | 1388      | 1387      | 1385      | 1388      | 1379      | 1385      | 1385      |
| $\nu_{\text{C-N(triazine)}}$ | 1238      | 1238      | 1236      | 1238      | 1238      | 1236      | 1236      |
| $\nu_{\text{C-N}}$           | 1171      | 1170      | 1175      | 1170      | 1179      | 1173      | 1167      |
| $\nu_{\text{Ar-H}}$          | 853,784   | 862,786   | 862,783   | 862,777   | 862,786   | 862,782   | 869,783   |

**UV-Vis spectra of 1-7(Fig.S11-S17).**

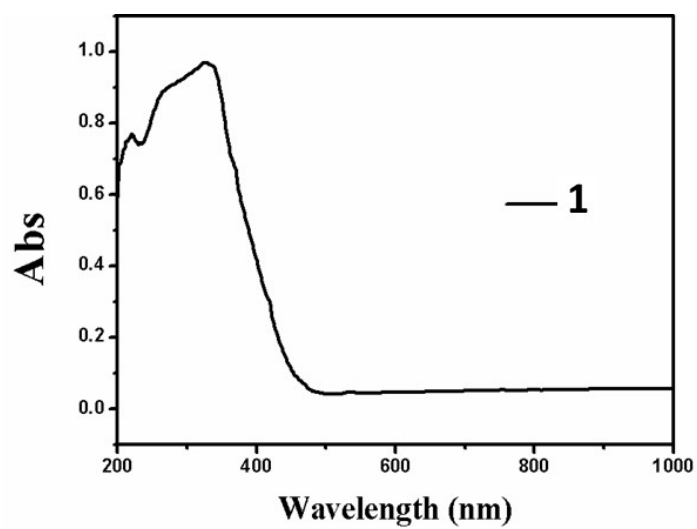

Fig.S11 Solid UV-Vis spectrum of **1** at room temperature.

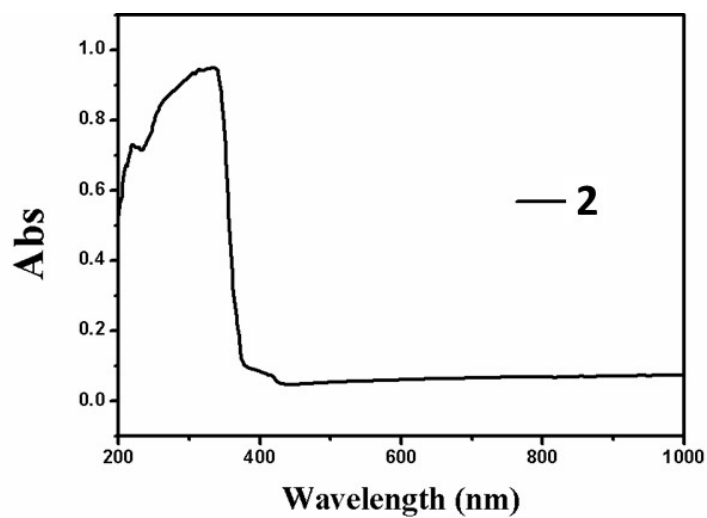

Fig.S12 Solid UV-Vis spectrum of **2** at room temperature.



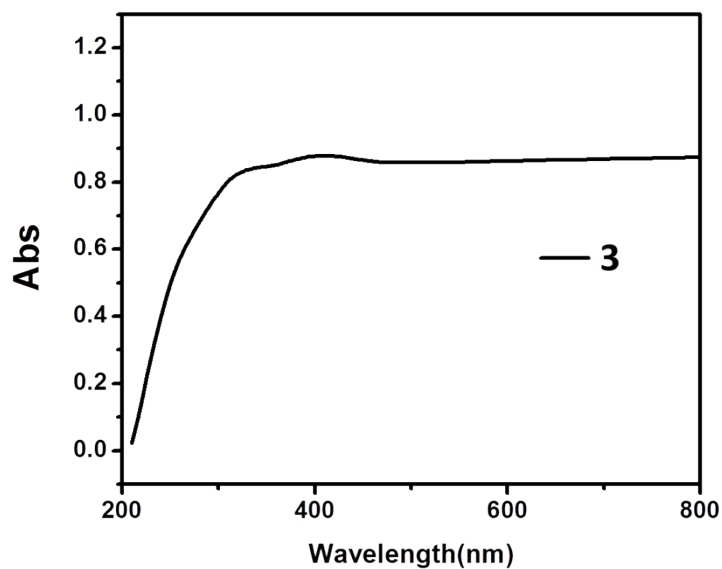

Fig.S13 Solid UV-Vis spectrum of **3** at room temperature.

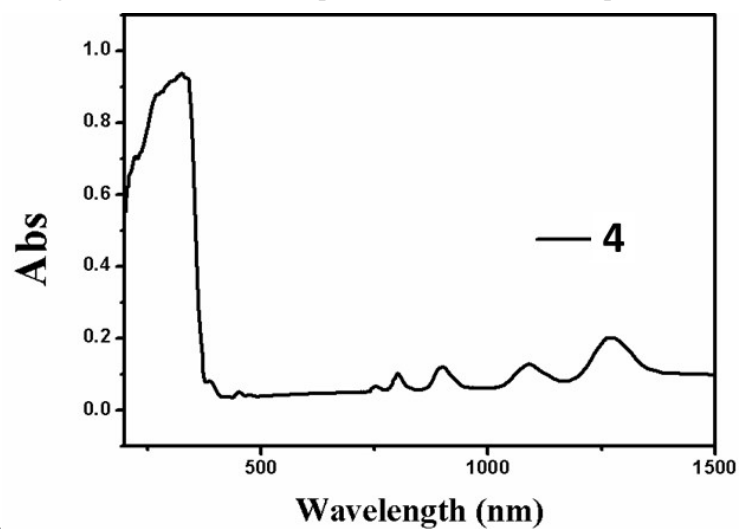

Fig.S14 Solid UV-Vis spectrum of **4** at room temperature.

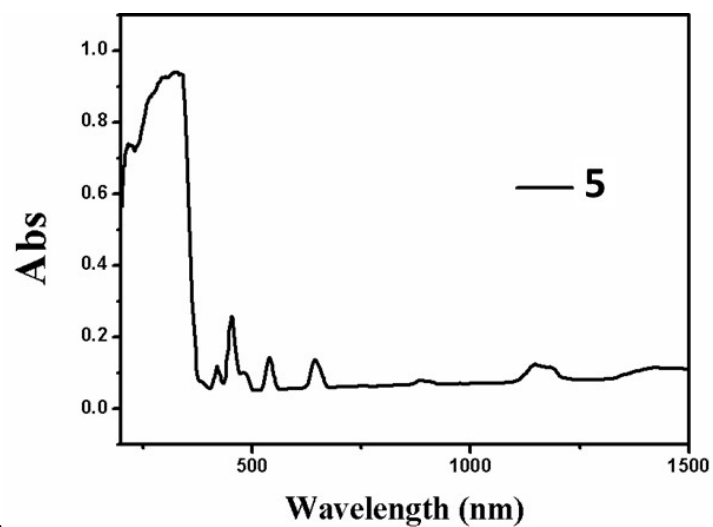

Fig.S15 Solid UV-Vis spectrum of **5** at room temperature.

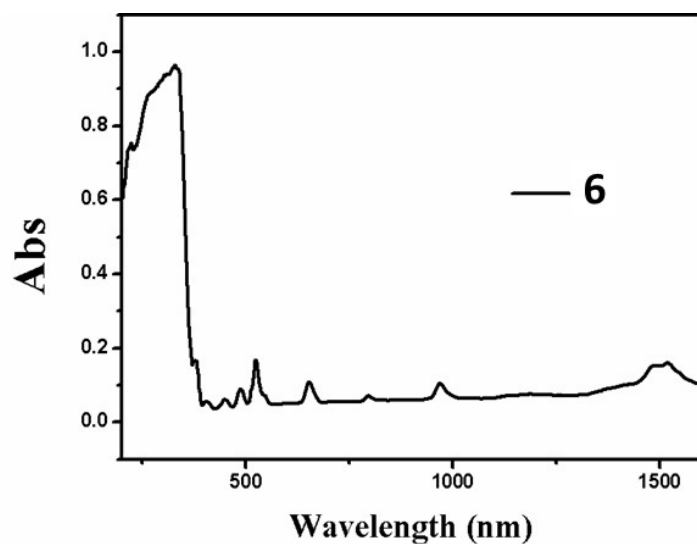

Fig.S16 Solid UV-Vis spectrum of **6** at room temperature.

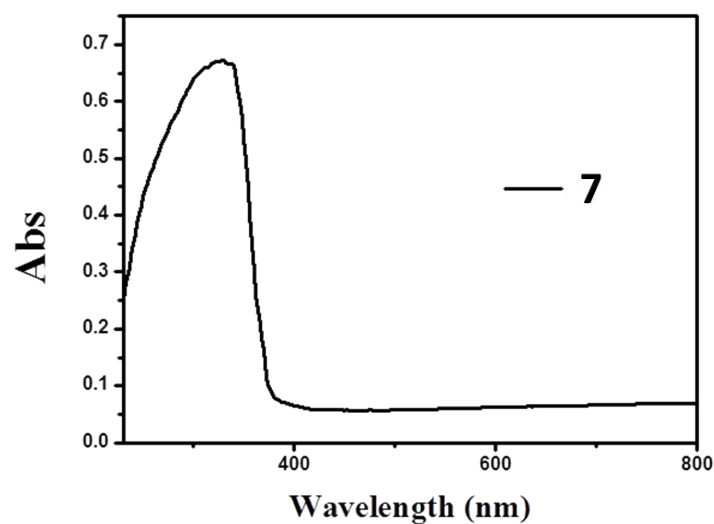

Fig.S17 Solid UV-Vis spectrum of **7** at room temperature.

**Table S2. Detailed attributes of UV-Vis data for 1-7.<sup>1-3</sup>**

| Compound | Peak of adsorption/(nm) | Attributes                                           |
|----------|-------------------------|------------------------------------------------------|
| <b>1</b> | 221, 226, 326           | $\pi \rightarrow \pi^*$                              |
| <b>2</b> | 219, 265, 331           | $\pi \rightarrow \pi^*$                              |
| <b>3</b> | 245, 327                | $\pi \rightarrow \pi^*$                              |
|          | 1270, 1091, 901         | ${}^6H_{15/2} \rightarrow {}^6F_J$                   |
|          | 801, 753                | ( $J=11/2, 9/2, 7/2, 5/2, 3/2$ )                     |
| <b>4</b> | 475, 451                | ${}^6H_{15/2} \rightarrow {}^4F_J$ ( $J=9/2, 15/2$ ) |

|          |               |                                            |
|----------|---------------|--------------------------------------------|
|          | 221, 268, 324 | $\pi \rightarrow \pi^*$                    |
|          | 1146, 886     | $^5I_8 \rightarrow ^5I_6 (J=6, 5)$         |
|          | 644, 539, 480 | $^5I_8 \rightarrow ^5F_J (J=5, 4, 3)$      |
|          | 454, 421, 384 | $^5I_8 \rightarrow ^5G_J (J=6, 5, 3)$      |
| <b>5</b> | 218, 264, 324 | $\pi \rightarrow \pi^*$                    |
|          | 1479, 1521    | $^4I_{15/2} \rightarrow ^4I_{1/2}$         |
|          | 970, 798      | $^4I_{15/2} \rightarrow ^4I_J (11/2, 9/2)$ |
|          | 653, 486      | $^4I_{15/2} \rightarrow ^4I_F (9/2, 7/2)$  |
| <b>6</b> | 221, 265, 327 | $\square \pi \rightarrow \pi^*$            |
| <b>7</b> | 251, 330      | $\square \pi \rightarrow \pi^*$            |

---

**TG curves of 1-7(Fig.S18-S24).**

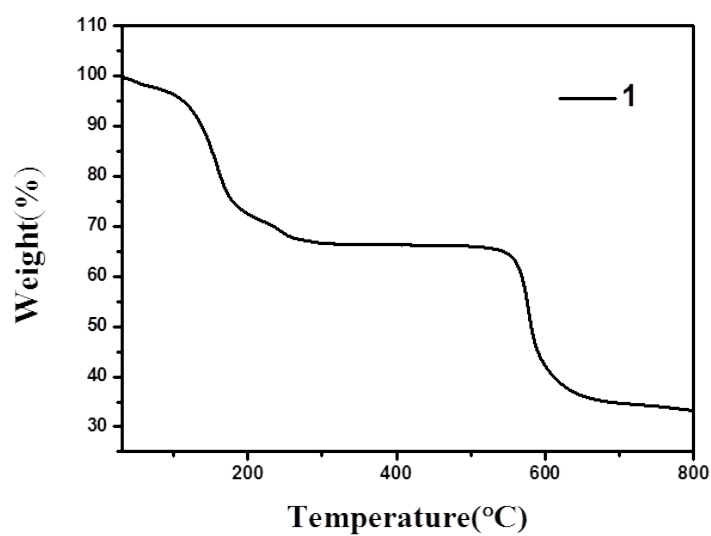

Fig.S18 TG curve of **1**.

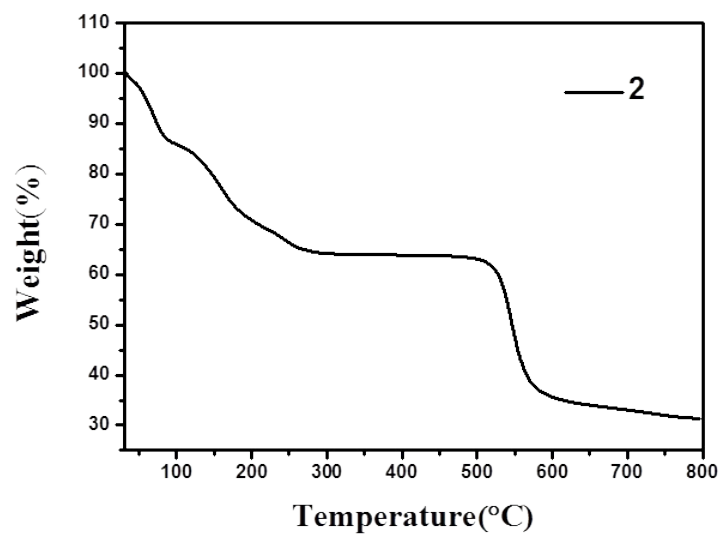

Fig.S19 TG curve of 2.

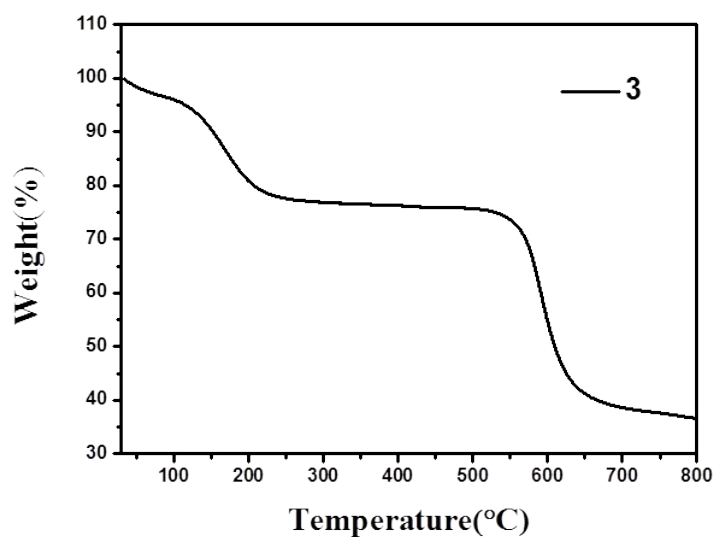

Fig.S20 TG curve of 3.

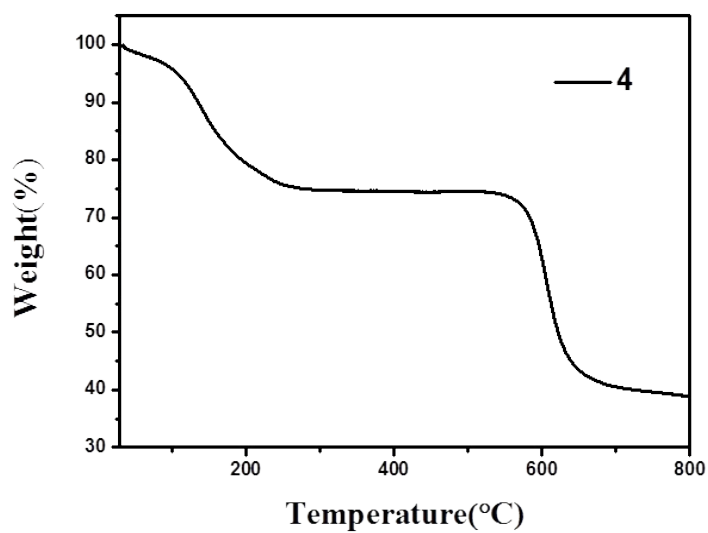

Fig.S21 TG curve of 4.

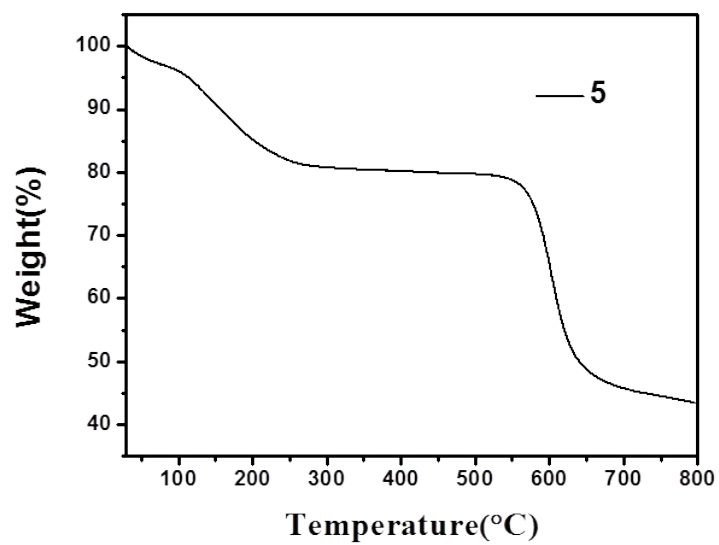

Fig.S22 TG curve of 5.

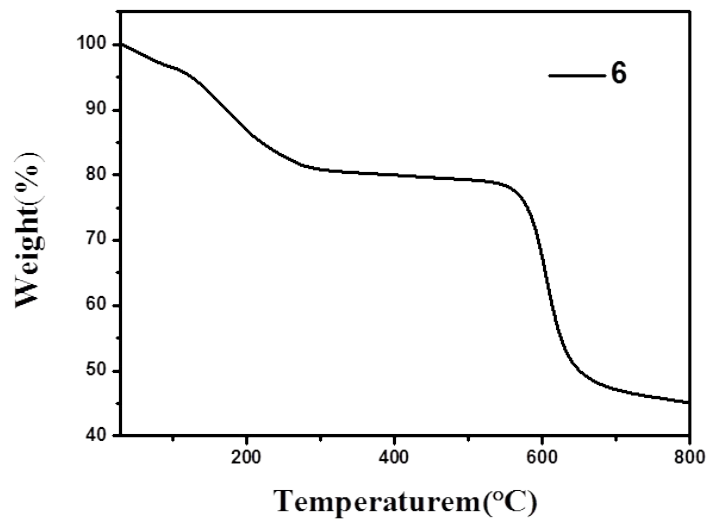

Fig.S23 TG curve of 6.

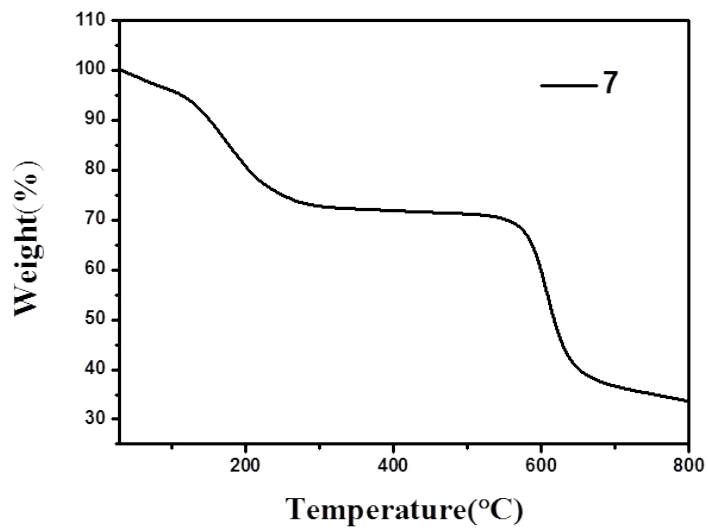

Fig.S24 TG curve of 7.

### Solid fluorescence spectra of 3 and 4.

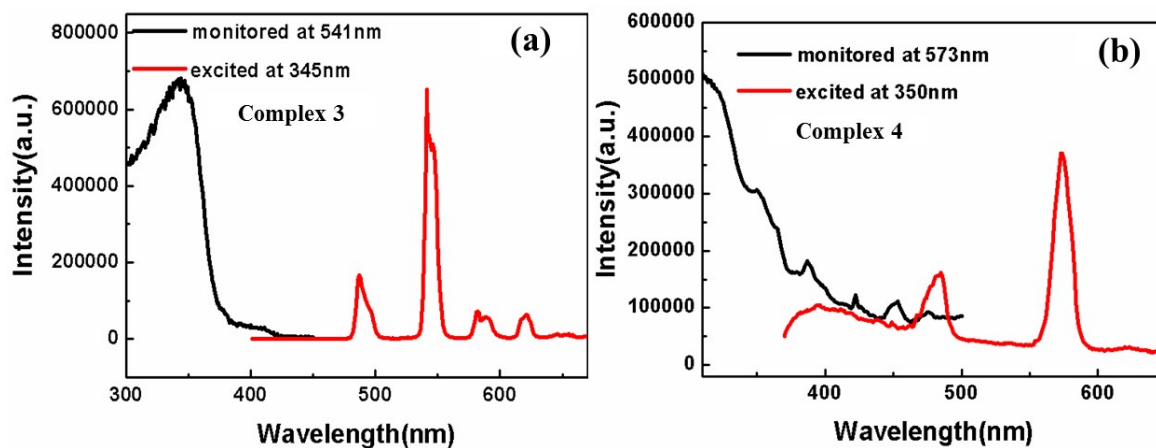

Fig.S25 Solid excitation and emission spectra of 3 and 4 show in (a) and (b).

### The stability test of 1 soaked in H<sub>2</sub>O and cyclohexane for 12h.

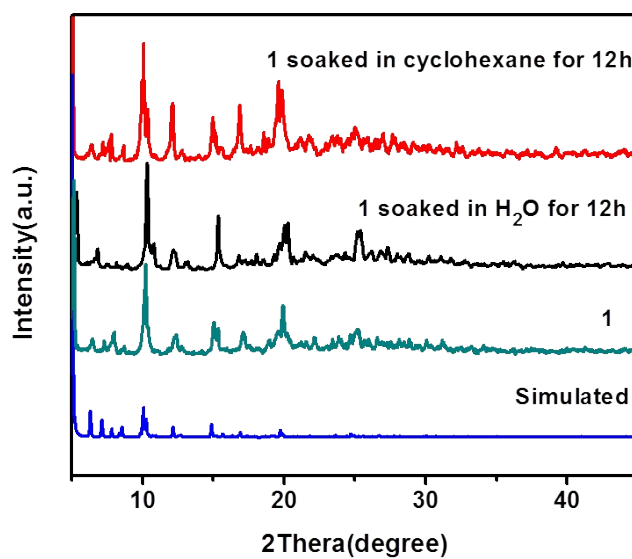

Fig.S26 The PXRD patterns of 1 soaked in H<sub>2</sub>O and cyclohexane for 12 h.

### PXRD patterns for 1 after capturing MB.

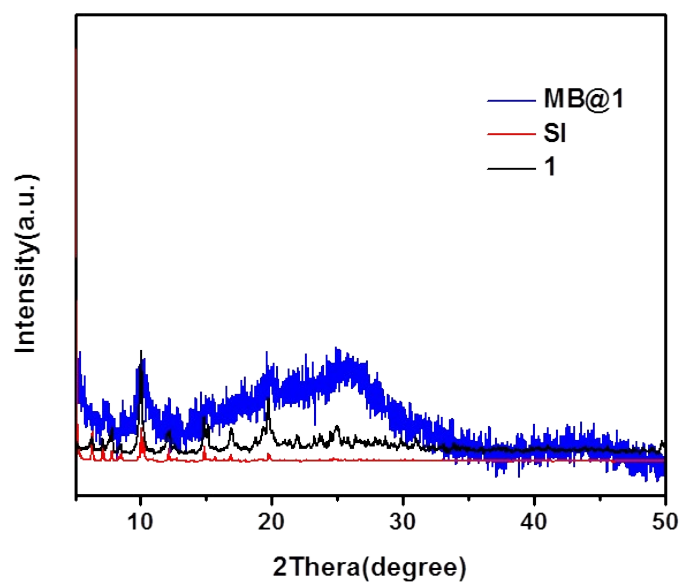

Fig.S27 PXRD patterns of 1 after capturing MB compared to simulated.

### PXRD patterns for 1 after capturing I<sub>2</sub> and releasing I<sub>2</sub>.

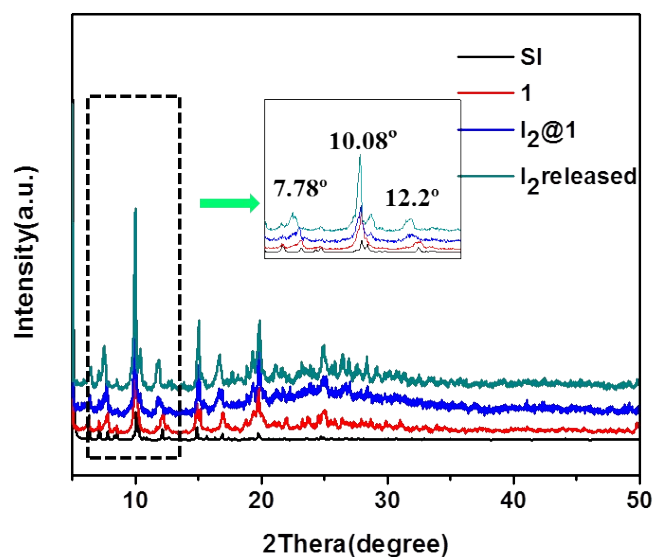

Fig. S28. PXRD patterns of I<sub>2</sub>@1 and I<sub>2</sub> released compared with simulated. The insert picture represents the angular movement of the peak at 7.78, 10.08 and 12.2 degrees.

## IR and UV-vis spectra for 1 after capturing I<sub>2</sub>.

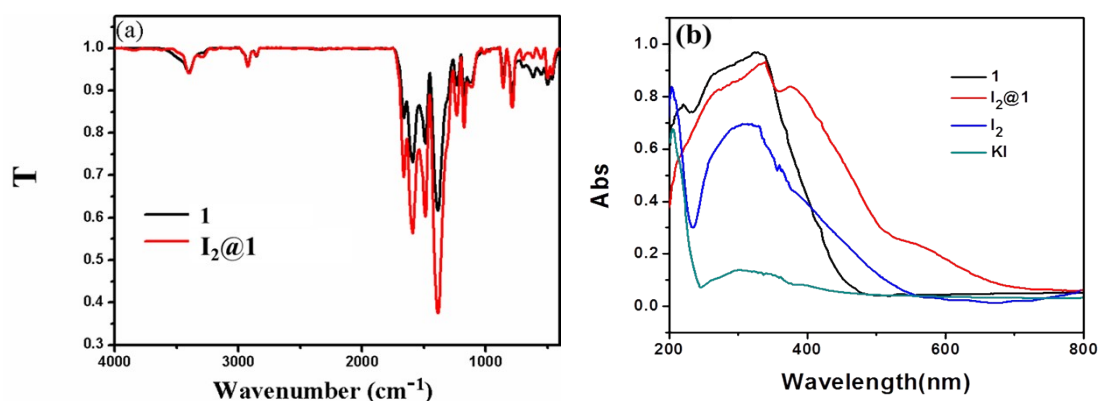

Fig. S29. (a) IR spectra of 1 and I<sub>2</sub>@1. (b) Solid-state UV-Vis spectra of 1, I<sub>2</sub>@1, I<sub>2</sub> and KI.

## PXRD Pawley refinement of I<sub>2</sub>@1.

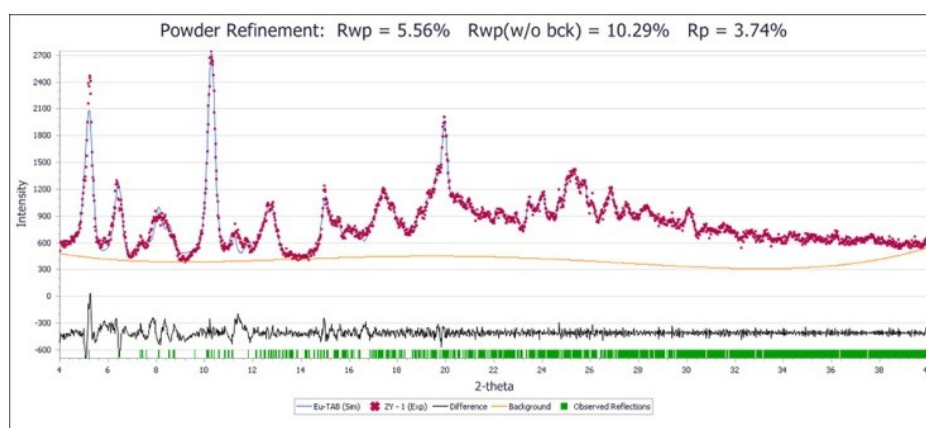

Fig.S30. PXRD Pawley refinement of I<sub>2</sub>@1 (Lattice Type: monoclinic, space group:  $P2_1/c$  (14). Rwp = 5.56%, Rp=3.74%, a = 28.869(7) Å, b = 22.218(6) Å, c = 15.166(4) Å, alpha = 90.0000, beta = 103.4689, gamma = 90.0000,  $\lambda$  = 1.540562 Å, GOF=1.038). Experimental data are shown as blue plots, the refined profiles as the purple petal-shaped points, and the difference under them as green plots. Reflection positions are marked with black. The detailed refinement data are listed in Table S7.



### The cycle tests of adsorption-desorption of I<sub>2</sub> with 1.

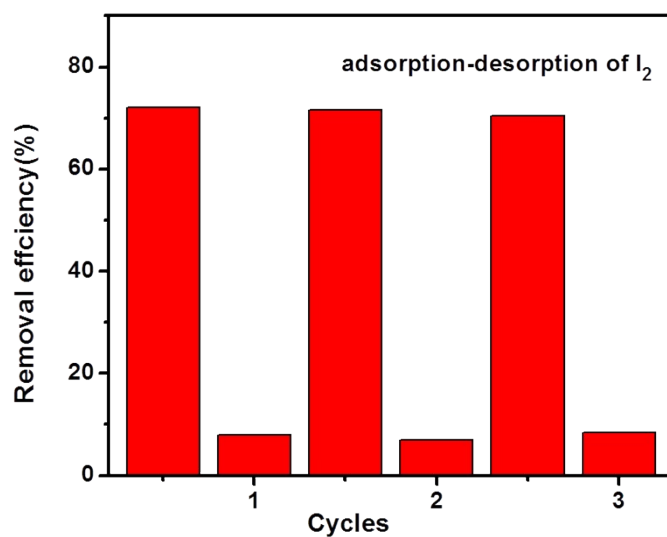

Fig.S31. The cycle tests of adsorption-desorption of I<sub>2</sub> with 1.

### The first-order-equation fitting model of adsorption to I<sub>2</sub> with 1.

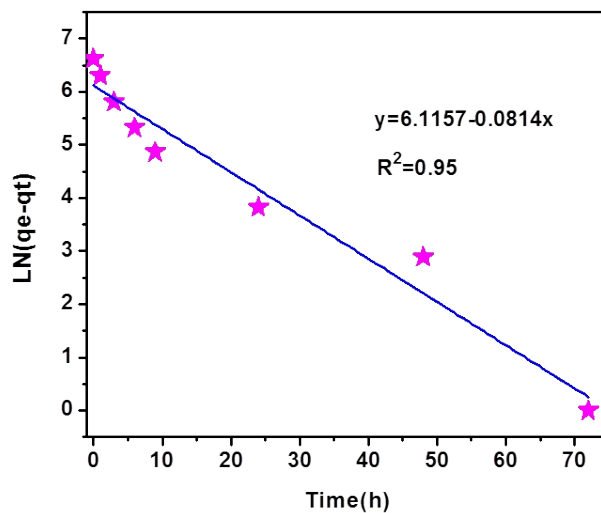

Fig.S32. The adsorption of iodine with 1 fitted with first-order-equation kinetic model. The constant  $R^2$  is 0.95 which is lower than the constant  $R^2$  0.99 fitted by pseudo-second-order.

**Table S3. Crystallographic data of 1-3\*.**

| Complexes                         | 1                                                                               | 2                                                                               | 3                                                                               |
|-----------------------------------|---------------------------------------------------------------------------------|---------------------------------------------------------------------------------|---------------------------------------------------------------------------------|
| Molecular formula                 | C <sub>48</sub> H <sub>30</sub> N <sub>12</sub> O <sub>12</sub> Eu <sub>2</sub> | C <sub>48</sub> H <sub>30</sub> N <sub>12</sub> O <sub>12</sub> Gd <sub>2</sub> | C <sub>48</sub> H <sub>30</sub> N <sub>12</sub> O <sub>12</sub> Tb <sub>2</sub> |
| Formula weight (g/mol)            | 1270.78                                                                         | 1281.34                                                                         | 1284.68                                                                         |
| Crystal system                    | Monoclinic                                                                      | Monoclinic                                                                      | Monoclinic                                                                      |
| Space group                       | <i>P2<sub>1</sub>/c</i>                                                         | <i>P2<sub>1</sub>/c</i>                                                         | <i>P2<sub>1</sub>/c</i>                                                         |
| a (Å)                             | 28.869(7)                                                                       | 28.7882(13)                                                                     | 29.106(5)                                                                       |
| b (Å)                             | 22.218(6)                                                                       | 22.6249(11)                                                                     | 21.998(4)                                                                       |
| c (Å)                             | 15.166(4)                                                                       | 15.2517(7)                                                                      | 15.091(3)                                                                       |
| α (°)                             | 90                                                                              | 90                                                                              | 90                                                                              |
| β (°)                             | 103.467(4)                                                                      | 103.626(10)                                                                     | 103.308(3)                                                                      |
| γ (°)                             | 90                                                                              | 90                                                                              | 90                                                                              |
| V (Å <sup>3</sup> )               | 9460(4)                                                                         | 9654.3(8)                                                                       | 9403(3)                                                                         |
| Z                                 | 4                                                                               | 4                                                                               | 4                                                                               |
| D g/cm <sup>-3</sup>              | 0.892                                                                           | 0.882                                                                           | 0.908                                                                           |
| F(000)                            | 2496                                                                            | 2504                                                                            | 2512                                                                            |
| μ(Mo-Kα)/mm <sup>-1</sup>         | 1.353                                                                           | 1.400                                                                           | 1.531                                                                           |
| θ (°)                             | 0.73-29.33                                                                      | 1.16-29.97                                                                      | 1.17-31.42                                                                      |
| Reflections collected             | 56217                                                                           | 56217                                                                           | 56217                                                                           |
| Parameters                        | 667                                                                             | 667                                                                             | 668                                                                             |
| Δ(ρ) (e Å <sup>-3</sup> )         | 7.202 and -4.552                                                                | 1.233 and -1.133                                                                | 8.301 and -6.798                                                                |
| Goodness of fit on F <sup>2</sup> | 1.038                                                                           | 1.030                                                                           | 1.019                                                                           |
| Final R indices[I>2σ(I)]          | R <sub>1</sub> =0.0446                                                          | R <sub>1</sub> =0.0444                                                          | R <sub>1</sub> =0.0440                                                          |
|                                   | wR <sub>2</sub> =0.1127                                                         | wR <sub>2</sub> =0.1119                                                         | wR <sub>2</sub> =0.1107                                                         |
| Final R indices[all data]         | R <sub>1</sub> =0.0570                                                          | R <sub>1</sub> =0.0569                                                          | R <sub>1</sub> =0.0564                                                          |
|                                   | wR <sub>2</sub> =0.1154                                                         | wR <sub>2</sub> =0.1146                                                         | wR <sub>2</sub> =0.1134                                                         |

\*R = Σ||F<sub>o</sub>| - |F<sub>c</sub>||/Σ|F<sub>o</sub>|, wR<sub>2</sub> = [Σw(F<sub>o</sub><sup>2</sup> - F<sub>c</sub><sup>2</sup>)<sup>2</sup>/Σw(F<sub>o</sub><sup>2</sup>)<sup>2</sup>]<sup>1/2</sup>, [F<sub>o</sub>>σ(F<sub>o</sub>)]

**Table S4. Crystallographic data of 4-7\*.**

| Complexes                         | 4                                                                               | 5                                                                               | 6                                                                               | 7                                                                              |
|-----------------------------------|---------------------------------------------------------------------------------|---------------------------------------------------------------------------------|---------------------------------------------------------------------------------|--------------------------------------------------------------------------------|
| Molecular formula                 | C <sub>48</sub> H <sub>30</sub> N <sub>12</sub> O <sub>12</sub> Dy <sub>2</sub> | C <sub>48</sub> H <sub>30</sub> N <sub>12</sub> O <sub>12</sub> Ho <sub>2</sub> | C <sub>48</sub> H <sub>30</sub> N <sub>12</sub> O <sub>12</sub> Er <sub>2</sub> | C <sub>48</sub> H <sub>30</sub> N <sub>12</sub> O <sub>12</sub> Y <sub>2</sub> |
| Formula weight (g/mol)            | 1291.84                                                                         | 1296.70                                                                         | 1301.36                                                                         | 1144.66                                                                        |
| Crystal system                    | Monoclinic                                                                      | Monoclinic                                                                      | Monoclinic                                                                      | Monoclinic                                                                     |
| Space group                       | <i>P2<sub>1</sub>/c</i>                                                         | <i>P2<sub>1</sub>/c</i>                                                         | <i>P2<sub>1</sub>/c</i>                                                         | <i>P2<sub>1</sub>/c</i>                                                        |
| a (Å)                             | 29.1041(11)                                                                     | 29.062(2)                                                                       | 28.9870(14)                                                                     | 29.082(8)                                                                      |
| b (Å)                             | 21.9828(8)                                                                      | 22.0255(15)                                                                     | 22.1223(11)                                                                     | 21.972(6)                                                                      |
| c (Å)                             | 15.0854(5)                                                                      | 15.0555(10)                                                                     | 15.01309(8)                                                                     | 15.182(4)                                                                      |
| α (°)                             | 90                                                                              | 90                                                                              | 90                                                                              | 90                                                                             |
| β (°)                             | 103.184(2)                                                                      | 103.2030(10)                                                                    | 103.227(2)                                                                      | 103.381(16)                                                                    |
| γ (°)                             | 90                                                                              | 90                                                                              | 90                                                                              | 90                                                                             |
| V (Å <sup>3</sup> )               | 9397.1(6)                                                                       | 9382.2(11)                                                                      | 9445.4(8)                                                                       | 9438.0(4)                                                                      |
| Z                                 | 4                                                                               | 4                                                                               | 4                                                                               | 4                                                                              |
| D g/cm <sup>-3</sup>              | 0.913                                                                           | 0.918                                                                           | 0.915                                                                           | 0.806                                                                          |
| F(000)                            | 2520                                                                            | 2528                                                                            | 2536                                                                            | 2304                                                                           |
| μ(Mo-Kα)/mm <sup>-1</sup>         | 1.617                                                                           | 1.714                                                                           | 1.804                                                                           | 1.263                                                                          |
| θ (°)                             | 1.94-27.09                                                                      | 0.72-27.18                                                                      | 1.7 to 29.32                                                                    | 1.93 to 28.68                                                                  |
| Reflections collected             | 56217                                                                           | 56217                                                                           | 56217                                                                           | 125315                                                                         |
| Parameters                        | 667                                                                             | 668                                                                             | 668                                                                             | 667                                                                            |
| Δ(ρ) (e Å <sup>-3</sup> )         | 6.528 and -4.461                                                                | 5.000 and -3.28                                                                 | 8.634 and -6.944                                                                | 4.027 and -2.192                                                               |
| Goodness of fit on F <sup>2</sup> | 1.018                                                                           | 1.020                                                                           | 1.030                                                                           | 0.931                                                                          |
| Final R indices [I > 2σ(I)]       | R <sub>1</sub> =0.0441<br>wR <sub>2</sub> =0.1107                               | R <sub>1</sub> =0.0442<br>wR <sub>2</sub> =0.1109                               | R <sub>1</sub> =0.0448<br>wR <sub>2</sub> =0.1121                               | R <sub>1</sub> =0.0970<br>wR <sub>2</sub> =0.2365                              |
| Final R indices [all data]        | R <sub>1</sub> =0.0564<br>wR <sub>2</sub> =0.1133                               | R <sub>1</sub> =0.0566<br>wR <sub>2</sub> =0.1135                               | R <sub>1</sub> =0.0571<br>wR <sub>2</sub> =0.1146                               | R <sub>1</sub> =0.1564<br>wR <sub>2</sub> =0.2573                              |

\*R = Σ||F<sub>o</sub>| - |F<sub>c</sub>||/Σ|F<sub>o</sub>|, wR<sub>2</sub> = [Σw(F<sub>o</sub><sup>2</sup> - F<sub>c</sub><sup>2</sup>)<sup>2</sup>/Σw(F<sub>o</sub><sup>2</sup>)<sub>2</sub>]<sup>1/2</sup>, [F<sub>o</sub> > 4σ(F<sub>o</sub>)]

**Table S5. Selected distances (Å) for 1-7.**

| <b>1</b>   |          |             |          |             |          |
|------------|----------|-------------|----------|-------------|----------|
| Eu(1)-O(1) | 2.298(3) | Eu(1)-O(10) | 2.356(3) | Eu(2)-O(5)  | 2.607(4) |
| Eu(1)-O(5) | 2.356(3) | Eu(1)-O(11) | 2.389(3) | Eu(2)-O(8)  | 2.323(3) |
| Eu(1)-O(6) | 2.267(3) | Eu(2)-O(2)  | 2.234(4) | Eu(2)-O(9)  | 2.380(3) |
| Eu(1)-O(7) | 2.345(3) | Eu(2)-O(3)  | 2.265(3) | Eu(2)-O(11) | 2.547(3) |
| Eu(1)-O(8) | 2.603(3) | Eu(2)-O(4)  | 2.309(4) | Eu(2)-O(12) | 2.379(3) |
| Eu(1)-O(9) | 2.567(3) |             |          |             |          |

<sup>1</sup> X, 3/2-Y, -1/2+Z. <sup>2</sup> -X, 2-Y, 2-Z.

| <b>2</b>   |          |             |          |                         |          |
|------------|----------|-------------|----------|-------------------------|----------|
| Gd(1)-O(1) | 2.314(3) | Gd(1)-O(10) | 2.398(3) | Gd(2)-O(5)              | 2.619(4) |
| Gd(1)-O(5) | 2.356(3) | Gd(1)-O(11) | 2.412(3) | Gd(2)-O(8) <sup>2</sup> | 2.323(3) |
| Gd(1)-O(6) | 2.298(3) | Gd(2)-O(2)  | 2.259(4) | Gd(2)-O(9) <sup>2</sup> | 2.400(3) |
| Gd(1)-O(7) | 2.346(3) | Gd(2)-O(3)  | 2.291(3) | Gd(2)-O(11)             | 2.560(3) |
| Gd(1)-O(8) | 2.616(3) | Gd(2)-O(4)  | 2.304(4) | Gd(2)-O(12)             | 2.421(3) |
| Gd(1)-O(9) | 2.575(3) |             |          |                         |          |

<sup>1</sup>X, 3/2-Y, 1/2+Z. <sup>2</sup> X, 3/2-Y, -1/2+Z.

| <b>3</b>   |          |             |          |                         |          |
|------------|----------|-------------|----------|-------------------------|----------|
| Tb(1)-O(1) | 2.296(3) | Tb(1)-O(10) | 2.341(3) | Tb(2)-O(5)              | 2.600(4) |
| Tb(1)-O(5) | 2.367(3) | Tb(1)-O(11) | 2.377(3) | Tb(2)-O(8) <sup>2</sup> | 2.332(3) |
| Tb(1)-O(6) | 2.251(3) | Tb(2)-O(2)  | 2.224(4) | Tb(2)-O(9) <sup>2</sup> | 2.370(3) |
| Tb(1)-O(7) | 2.359(3) | Tb(2)-O(3)  | 2.254(3) | Tb(2)-O(11)             | 2.542(3) |
| Tb(1)-O(8) | 2.597(3) | Tb(2)-O(4)  | 2.326(4) | Tb(2)-O(12)             | 2.358(3) |
| Tb(2)-O(9) | 2.564(3) |             |          |                         |          |

<sup>1</sup> X, 3/2-Y, 1/2+Z. <sup>2</sup> X, 3/2-Y, -1/2+Z.

| <b>4</b>   |          |             |          |                         |          |
|------------|----------|-------------|----------|-------------------------|----------|
| Dy(1)-O(1) | 2.298(3) | Dy(1)-O(10) | 2.340(3) | Dy(2)-O(5)              | 2.602(4) |
| Dy(1)-O(5) | 2.365(3) | Dy(1)-O(11) | 2.378(3) | Dy(2)-O(8) <sup>2</sup> | 2.336(3) |
| Dy(1)-O(6) | 2.250(3) | Dy(2)-O(2)  | 2.222(4) | Dy(2)-O(9) <sup>2</sup> | 2.368(4) |
| Dy(1)-O(7) | 2.358(3) | Dy(2)-O(3)  | 2.252(3) | Dy(2)-O(11)             | 2.539(3) |

|                                                               |          |                         |          |                         |          |
|---------------------------------------------------------------|----------|-------------------------|----------|-------------------------|----------|
| Dy(1)-O(8)                                                    | 2.596(3) | Dy(2)-O(4)              | 2.328(4) | Dy(2)-O(12)             | 2.357(3) |
| Dy(1)-O(9)                                                    | 2.566(3) |                         |          |                         |          |
| <sup>1</sup> X, 3/2-Y, 1/2+Z. <sup>2</sup> X, 3/2-Y, -1/2+Z.  |          |                         |          |                         |          |
| <b>5</b>                                                      |          |                         |          |                         |          |
| Ho(1)-O(1)                                                    | 2.297(3) | Ho(1)-O(10)             | 2.344(3) | Ho(2)-O(5)              | 2.597(4) |
| Ho(1)-O(5)                                                    | 2.362(3) | Ho(1)-O(11)             | 2.376(3) | Ho(2)-O(8) <sup>2</sup> | 2.331(3) |
| Ho(1)-O(6)                                                    | 2.252(3) | Ho(2)-O(2)              | 2.224(4) | Ho(2)-O(9) <sup>2</sup> | 2.366(3) |
| Ho(1)-O(7)                                                    | 2.356(3) | Ho(2)-O(3)              | 2.253(3) | Ho(2)-O(11)             | 2.536(3) |
| Ho(1)-O(8)                                                    | 2.592(3) | Ho(2)-O(4)              | 2.325(4) | Ho(2)-O(12)             | 2.361(3) |
| Ho(1)-O(9)                                                    | 2.561(3) |                         |          |                         |          |
| <sup>1</sup> X, 3/2-Y, 1/2+Z. <sup>2</sup> X, 3/2-Y, -1/2+Z.  |          |                         |          |                         |          |
| <b>6</b>                                                      |          |                         |          |                         |          |
| Er(1)-O(1)                                                    | 2.302(3) | Er(1)-O(10)             | 2.353(3) | Er(2)-O(5)              | 2.609(4) |
| Er(1)-O(5)                                                    | 2.361(3) | Er(1)-O(11)             | 2.389(3) | Er(2)-O(8) <sup>2</sup> | 2.334(3) |
| Er(1)-O(6)                                                    | 2.259(3) | Er(2)-O(2)              | 2.229(4) | Er(2)-O(9) <sup>2</sup> | 2.375(4) |
| Er(1)-O(7)                                                    | 2.353(3) | Er(2)-O(3)              | 2.259(3) | Er(2)-O(11)             | 2.540(3) |
| Er(1)-O(8)                                                    | 2.601(3) | Er(2)-O(4)              | 2.321(4) | Er(2)-O(12)             | 2.372(3) |
| Er(1)-O(9)                                                    | 2.567(3) |                         |          |                         |          |
| <sup>1</sup> X, 3/2-Y, 1/2+Z. <sup>2</sup> X, 3/2-Y, -1/2+Z.  |          |                         |          |                         |          |
| <b>7</b>                                                      |          |                         |          |                         |          |
| Y(1)-O(1)                                                     | 2.652(5) | Y(1)-O(9) <sup>1</sup>  | 2.363(4) | Y(2)-O(8) <sup>2</sup>  | 2.337(4) |
| Y(1)-O(2)                                                     | 2.561(4) | Y(1)-O(11) <sup>1</sup> | 2.323(4) | Y(2)-O(9) <sup>2</sup>  | 2.570(4) |
| Y(1)-O(3)                                                     | 2.309(4) | Y(2)-O(1)               | 2.354(4) | Y(2)-O(10)              | 2.369(4) |
| Y(1)-O(4)                                                     | 2.342(4) | Y(2)-O(2)               | 2.368(4) | Y(2)-O(11)              | 2.610(4) |
| Y(1)-O(5)                                                     | 2.248(4) | Y(2)-O(7)               | 2.300(4) | Y(2)-O(12)              | 2.248(4) |
| Y(2)-O(6)                                                     | 2.224(5) |                         |          |                         |          |
| <sup>1</sup> X, 1/2-Y, 1/2+Z. <sup>2</sup> 1-X, 1/2+Y, 1/2-Z. |          |                         |          |                         |          |

**Table S6. The comparison of I<sub>2</sub> adsorption amount in recent years.**

| Compound | the adsorption amount | Temperature(K) | Refs. |
|----------|-----------------------|----------------|-------|
|----------|-----------------------|----------------|-------|

|                  | of iodine(mg·g <sup>-1</sup> ) |     |                                                                      |
|------------------|--------------------------------|-----|----------------------------------------------------------------------|
| Ca-MOF           | 460                            | RT* | Chemistry- A European Journal, 2018. <sup>4</sup>                    |
|                  | 250                            | 348 |                                                                      |
| HKUST-1 @polymer | 720                            | RT* | Advanced Functional Materials, 2018. <sup>5</sup>                    |
| Cu-MOF           | 492.37                         | RT* | Chinese Journal of Inorganic Chemistry, 2015. <sup>6</sup>           |
| Cu-MOF           | 144                            | RT* | Journal of Radioanalytical and Nuclear Chemistry, 2020. <sup>7</sup> |
| <b>1</b>         | 758.72                         | RT* | This work                                                            |

\*RT=room temperature. HKUST=Hong Kong University of Science and Technology

**Table S7. Reflex summary report for Pawley refinement of I<sub>2</sub>@1.**

| Reflex Summary Report for Pawley Refinement of I <sub>2</sub> @1                  |                   |                      |       |
|-----------------------------------------------------------------------------------|-------------------|----------------------|-------|
| Final R <sub>wp</sub>                                                             | 5.56%             | Final R <sub>p</sub> | 3.74% |
| Final R <sub>wp</sub> (without background)                                        | 10.29%            | Final CMACS          | 0.03% |
|                                                                                   | Lattice Parameter | Value                |       |
|                                                                                   | a                 | 28.86688 ± 0.00311   |       |
|                                                                                   | b                 | 22.21632 ± 0.00269   |       |
| Lattice Type: Monoclinic,<br>Space Group: <i>P</i> 2 <sub>1</sub> / <i>C</i> (14) | c                 | 15.16582 ± 0.00162   |       |
|                                                                                   | α                 | 90                   |       |
|                                                                                   | β                 | 103.47024 ± 0.00562  |       |
|                                                                                   | γ                 | 90                   |       |

## References

- 1 N. Zhang, Y.-H. Xing and F.-Y. Bai, A Uranyl-Organic Framework Featuring Two-Dimensional Graphene-like Layered Topology for Efficient Iodine and Dyes Capture, *Inorganic Chemistry*, 2019, **58**, 6866-6876.
- 2 X.-L. Qu and B. Yan, Stable Tb(III)-Based Metal-Organic Framework: Structure, Photoluminescence, and Chemical Sensing of 2-Thiazolidinethione-4-carboxylic Acid as a Biomarker of CS<sub>2</sub>, *Inorganic Chemistry*, 2018, **58**, 524-534.
- 3 Y. Wang, S.-H. Xing, F.-Y. Bai, Y.-H. Xing and L.-X. Sun, Stable Lanthanide-Organic Framework Materials Constructed by a Triazolyl Carboxylate Ligand: Multifunction Detection and White Luminescence Tuning, *Inorganic Chemistry*, 2018, **57**, 12850-12859.
- 4 A. Gładysiak, T. N. Nguyen, M. Spodaryk, J. H. Lee, J. B. Neaton, A. Züttel and K. C. Stylianou, Incarceration of Iodine in a Pyrene - Based Metal - Organic Framework, *Chemistry- A European Journal*, 2018, DOI: 10.1002/chem.201805073.

- 5 B. Valizadeh, T. N. Nguyen, B. Smit and K. C. Stylianou, Porous Metal-Organic Framework@Polymer Beads for Iodine Capture and Recovery Using a Gas-Sparged Column, *Advanced Functional Materials*, 2018, **28**, 1-6.
- 6 H. C. L. Z. Y. M. F. J. J.-J. B. Jun-Feng, A Microporous 3D MOF Constructed from an Acylamide Tetracid Ligand: Effective Reversible Iodine Adsorption Property, *Chinese Journal of Inorganic Chemistry*, 2015, **31**, 2103-2110.
- 7 M. Li, G. Yuan, Y. Zeng, Y. Yang, J. Liao, J. Yang and N. Liu, Flexible surface-supported MOF membrane via a convenient approach for efficient iodine adsorption, *Journal of Radioanalytical and Nuclear Chemistry*, 2020, **324**, 1167-1177.
